# Supplementary material for: Breaking sitting with light activities vs structured exercise: a randomised crossover study demonstrating benefits for glycaemic control and insulin sensitivity in type 2 diabetes
Source: Diabetologia. 2016 Nov 30;60(3):490–8. doi: 10.1007/s00125-016-4161-7 (PMC6518091; doi:10.1007/s00125-016-4161-7)
Supplement: Supplementary file 1 — (PDF 191 kb) [file 125_2016_4161_MOESM1_ESM.pdf]

**ESM Table 1** Physical activity and diet analysis during last day of each activity regimen

| Variables                         | SIT        | EXE        | SL           | <i>p</i> value <sup>a</sup> | <i>p</i> EXE-SIT <sup>b</sup> | <i>p</i> SL-SIT <sup>b</sup> | <i>p</i> SL-EXE <sup>b</sup> |
|-----------------------------------|------------|------------|--------------|-----------------------------|-------------------------------|------------------------------|------------------------------|
| <b>Estimated EE (MET × h/day)</b> | 32.0 (0.1) | 36.9 (0.2) | 37.5 (0.3)   | <0.001                      | <0.001                        | <0.001                       | 0.056                        |
| <b>Energy intake (kJ)</b>         | 9340 (299) | 9367 (284) | 9351 (293)   | 0.953                       | 0.779                         | 0.891                        | 0.792                        |
| <b>Carbohydrates (%)</b>          | 52.1 (0.7) | 52.4 (0.6) | 52.5 (0.6)   | 0.332                       | 0.400                         | 0.253                        | 0.315                        |
| <b>Protein (%)</b>                | 17.2 (0.4) | 17.2 (0.4) | 17.0 (0.4)   | 0.228                       | 0.822                         | 0.498                        | 0.116                        |
| <b>Fat (%)</b>                    | 30.5 (0.9) | 30.3 (0.8) | 30.2 (0.8)   | 0.438                       | 0.560                         | 0.253                        | 0.590                        |
| <b>Sitting (h/day)</b>            | 13.7 (0.4) | 13.0 (0.3) | 9.0 (0.4)    | <0.001                      | 0.162                         | <0.001                       | <0.001                       |
| <b>Walking (h/day)</b>            | 0.9 (0.1)  | 0.9 (0.1)  | 3.2 (0.1)    | <0.001                      | 0.692                         | <0.001                       | <0.001                       |
| <b>Standing (h/day)</b>           | 1.5 (0.1)  | 1.3 (0.1)  | 3.9 (0.2)    | <0.001                      | 0.181                         | <0.001                       | <0.001                       |
| <b>Cycling (h/day)</b>            | -          | 1.1 (0.1)  | -            | -                           | -                             | -                            | -                            |
| <b>Sleeping (h/day)</b>           | 7.9 (0.3)  | 7.7 (0.2)  | 8.0 (0.3)    | 0.372                       | 0.444                         | 0.886                        | 0.169                        |
| <b>Steps/day (n)</b>              | 4476 (321) | 4595 (244) | 17,993 (654) | <0.001                      | 0.708                         | <0.001                       | <0.001                       |
| <b>Cadence (steps/min)</b>        | 84 (2)     | 84 (2)     | 95 (2)       | <0.001                      | 0.826                         | <0.001                       | <0.001                       |

Data (*n*=19 individuals) are presented as estimated means (SEM)

Diet and activities (during last day of each activity regimen) were assessed via diary data and activPAL accelerometry respectively

*P* values were generated using linear mixed model analyses for <sup>a</sup>overall difference and <sup>b</sup>pairwise comparisons between activity regimens

EE, Energy expenditure; EXE, Exercise; SIT, Sitting; SL, Sit Less

**ESM Fig. 1: Trial CONSORT diagram**

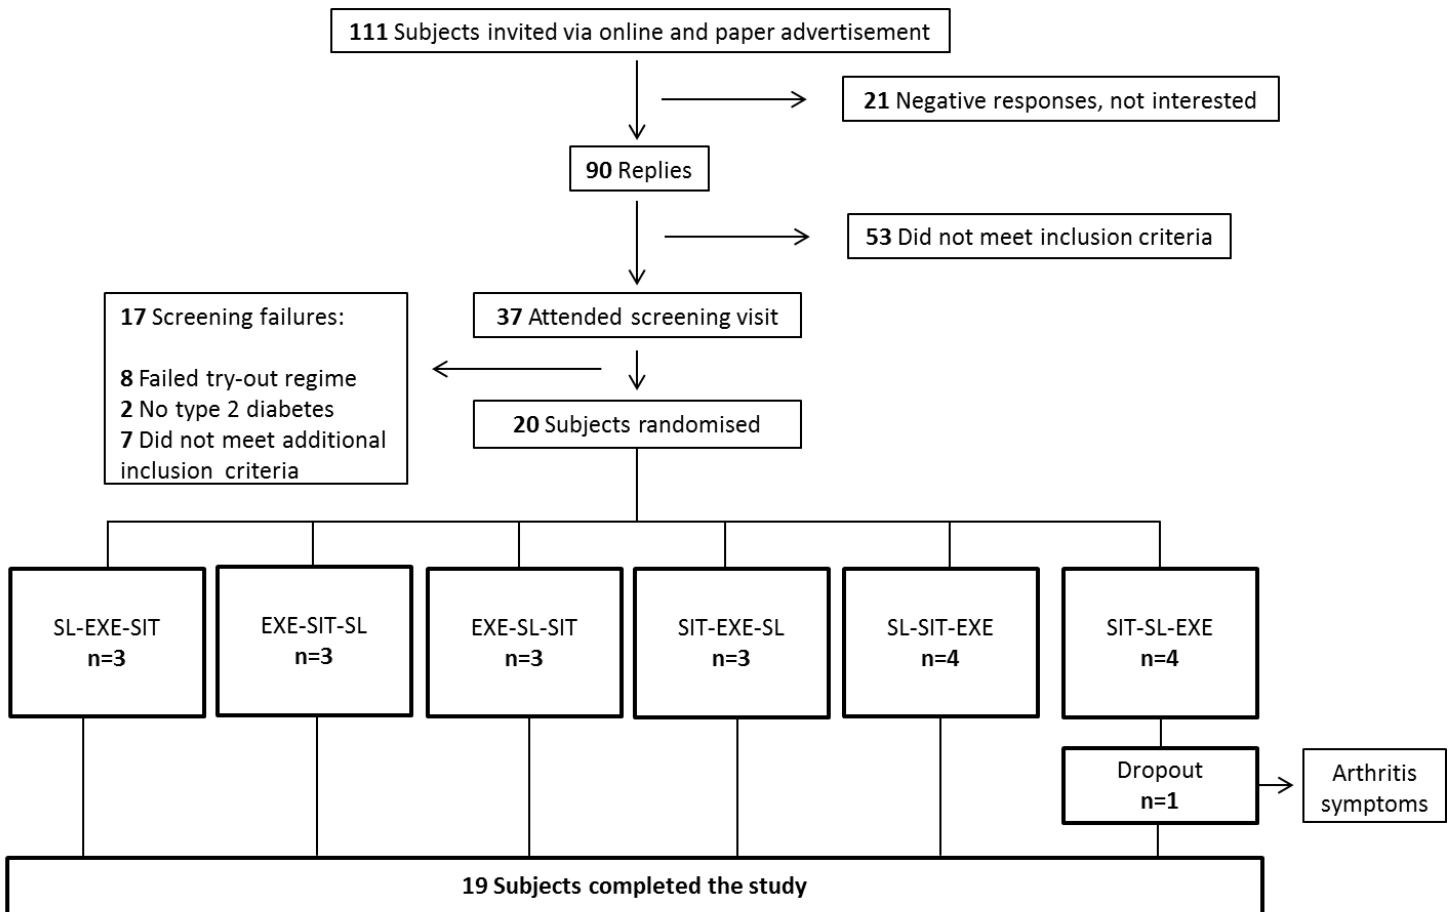

EXE, Exercise; SIT, Sitting; SL, Sit Less
